# Supplementary material
Source: Springer Nature journal article supplement (https://www.springermedizin.de/resource/supplementary/12865_2011_434_MOESM8_ESM.pdf/9427984)
Supplement: MOESM8 [file 9427984]

**Table 1. Demographic characteristics and clinical data of the groups.**

|                              | <b>Type 2 diabetes</b> | <b>Healthy</b>  | <b>P value</b> |
|------------------------------|------------------------|-----------------|----------------|
| n                            | 21                     | 26              |                |
| Gender (M/F)                 | 8 / 13                 | 6 / 20          | 0.0832         |
| Age (years)                  | 51.16 (10.17)          | 48.48 (9.42)    | 0.1868         |
| BMI (kg/m <sup>2</sup> )     | 27.85 (4.64)           | 28.32 (2.22)    | 0.4579         |
| Glucose (mg/dl)              | 265.30 (79.71)         | 96.28 (9.19)    | < 0.0001 *     |
| Creatinine (mg/dl)           | 0.70 (0.24)            | 0.76 (0.12)     | 0.0757         |
| Cholesterol (mg/dl)          | 211.50 (37.15)         | 212.00 (43.44)  | 0.4547         |
| Triglycerides (mg/dl)        | 295.50 (297.10)        | 198.00 (116.80) | 0.0171 *       |
| LDL cholesterol (mg/dl)      | 129.30 (37.29)         | 134.60 (34.26)  | 0.5            |
| HDL cholesterol (mg/dl)      | 45.16 (8.96)           | 46.08 (12.23)   | 0.4019         |
| Hb1Ac (%)                    | 10.42 (2.04)           | 5.58 (0.25)     | < 0.0001 *     |
| Time since diagnosis (years) | 7                      | —               |                |

Data are means SD. \*P values correspond to the differences between healthy and type 2 diabetes.
